# Supplementary material
Source: Springer Nature journal article supplement (https://www.springermedizin.de/resource/supplementary/12957_2013_1646_MOESM1_ESM.docx/9563154)

**Figure 1: Effect of Secondary Bile Acids on The Cell**

**
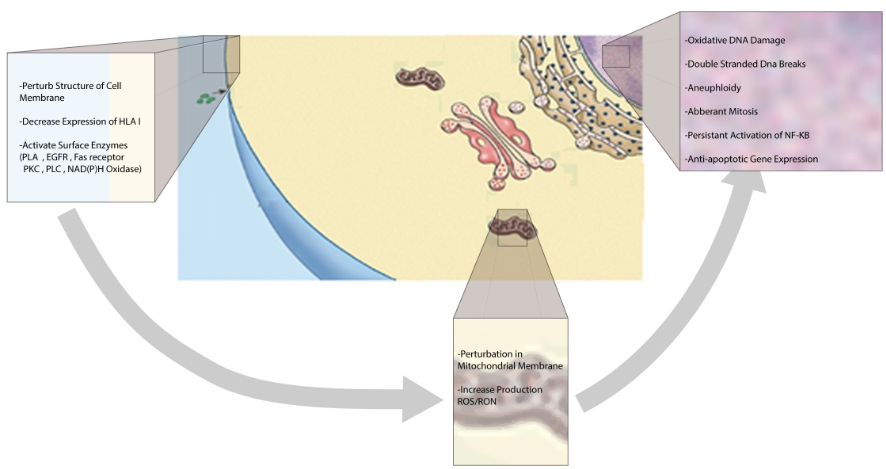
**

**Figure 2**


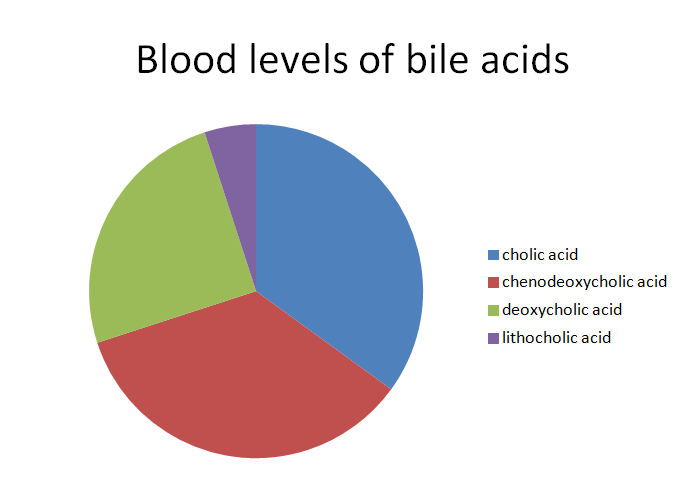


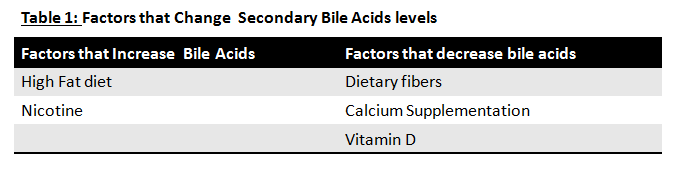

Supplement: MOESM1 [file 9563154]
